# Supplementary material for: Quality of life ratings in dementia care – a cross-sectional study to identify factors associated with proxy-ratings
Source: Springer Nature journal article supplement (doi:10.1186/s12955-014-0177-1), 2014-12-01
Supplement: MOESM1 [file 9763894]

Table 1: Characteristics of study sample

|  | **Residents (n = 133)** | | |
| --- | --- | --- | --- |
| **Age** in years; mean (SD) | 85.4 (7.2) | | |
| **Women** in % (n) | 81.4 (105) | | |
| **Time being in the ward** in years; mean (SD) | 2.6 (2.7) | | |
| **Severity of dementia** (GDS) in % (n) |  | | |
| ≤4 (no to moderate cognitive decline) | 1.5 (2) | | |
| 5 (moderately severe cognitive decline) | 3.0 (4) | | |
| 6 (severe cognitive decline) | 21.8 (29) | | |
| 7 (very severe cognitive decline) | 73.7 (98) | | |
| **Challenging behavior** (CMAI) in % (n) |  | | |
| Physically nonaggressive behavior | 51.1 (68) | | |
| Verbally agitated behavior | 37.6 (50) | | |
| Aggressive behavior | 21.1 (28) | | |
| Minimum one challenging behavior | 63.2 (84) | | |
|  | **Nurses (n = 88)** | | |
| **Age** in years; mean (SD) | 37.2 (10.3) | | |
| **Women** in % (n) | 88.1 (74) | | |
| **Profession** in% (n) |  | | |
| Nursing assistances | 47.7 (42) | | |
| Registered nurses | 52.3 (46) | | |
| **Time of work experiences** in years; mean (SD) | 7.4 (7.4) | | |
| **Time on the ward** in years; mean (SD) | 2.5 (2.3) | | |
| **Attitude towards people with dementia** (ADQ); mean (SD) |  | | |
| Total (19-95) | 72.1 (7.2) | | |
| Person centeredness (11-55) | 44.3 (4.7) | | |
| Hope (8-40) | 27.9 (3.8) | | |
| **Empathy** (JSPE; 20-140; mean (SD)) | 83.9 (6.0) | | |
| **Burnout** (MBI) in % (n) |  | | |
|  | Low burden | Moderate burden | Severe burden |
| Emotional exhaustion | 17.0 (15) | 37.5 (33) | 25.0 (22) |
| Depersonalization | 14.8 (13) | 54.5 (48) | 11.4 (10) |
| Personal accomplishment | 26.1 (23) | 42.0 (37) | 13.6 (12) |
| **Satisfaction with life** (SWLS; 5-35; mean (SD)) | 24.4 (6.5) | | |

SD: standard deviation; GDS: Global Deterioration Scale; CMAI: Cohen-Mansfield Agitation Inventory; ADQ: Approach to Dementia Questionnaire; JSPE: Jefferson Scale of Physician Empathy; Scale of MBI: Maslach Burnout Inventory; SWLS: Satisfaction with Life Scale
