# Supplementary material for: Quality of life ratings in dementia care – a cross-sectional study to identify factors associated with proxy-ratings
Source: Springer Nature journal article supplement (doi:10.1186/s12955-014-0177-1), 2014-12-01
Supplement: MOESM3 [file 9763894]

Tab 3: Factors Associated with ADRQL-ratings

| **Dependent variable** | **p-value** | **R2** | **Significant independent variable** |
| --- | --- | --- | --- |
| ADRQL**: Total score** | **p< 0.001** | 0.244 | Challenging behavior (CMAI)★  Severity of dementia (GDS)★★★  Burnout (MBI – EE)★★  Circumstances of ratings★★★  Time being on the ward (nurse)★★  Satisfaction with life (SWLS)★★★ |
| non-significant independent variable: 3, 4, 5, 6, 8, 9, 12, 13, 15 (see underline) | | |
| ADRQL**: Social interaction** | **p< 0.001** | 0.170 | Severity of Dementia (GDS)★★  Registered nurse (yes/no)★★  Circumstances of ratings★★  Satisfaction with life (SWLS)★ |
| non-significant independent variable: 1, 3, 4, 5, 7, 8, 9, 11, 12, 13, 15 (see underline) | | |
| ADRQL**: Awareness of self** | **p< 0.001** | 0.227 | Severity of dementia (GDS)★★★  Circumstances of ratings★★  Satisfaction with life (SWLS)★★  Days worked in advance of the ratings★ |
| non-significant independent variable: 1, 3, 4, 5, 6, 7, 8, 9, 11, 12, 13, (see underline) | | |
| ADRQL: **Moods and feelings** | **p< 0.001** | 0.266 | Challenging behavior (CMAI)★★  Severity of dementia (GDS)★  Burnout (MBI – EE)★★  Burnout (MBI – PA)★★  Circumstances of ratings★★★  Time being on the ward (nurse)★★★  Satisfaction with life (SWLS)★★★ |
| non-significant independent variable: 3, 4, 5, 6, 9, 12, 13, 15 (see underline) | | |
| ADRQL: **Enjoyment of activities** | **p=0.002** | 0.140 | Severity of dementia (GDS)★★★  Satisfaction with life (SWLS)★★ |
| non-significant independent variable: 1, 3, 4, 5, 6, 7, 8, 9, 10, 11, 12, 13, 15 (see underline) | | |
| ADRQL: **Response to surroundings** | **p=0.001** | 0.168 | Challenging behavior (CMAI)★★★  Responsible nurse (yes/no)★  Circumstances of ratings★★★  Time being on the ward (nurse)★★  Days worked in advance of the ratings★ |
| non-significant independent variable: 2, 3, 4, 6, 7, 8, 9, 12, 13, 14 (see underline) | | |

1: min. 1 challenging behavior (CMAI); 2: severity of dementia (GDS); 3: sex (residents); 4: sex (nurses); 5: responsible nurse (yes/no); 6: registered nurse (yes/no); 7: Burnout – emotional exhaustion (MBI-EE); 8: Burnout – personal accomplishment (MBI-PA); 9: Burnout – depersonalization (MBI-D); 10: Circumstances of ratings; 11: time being on the ward (nurse); 12: attitude – ADQ (total score); 13: empathy (JSPE); 14: satisfaction with life (SWLS); 15: days worked in advanced of the ratings★p<0.05, ★★ p<0.10, ★★★ p<0.001
