# Supplementary material for: Quality of life ratings in dementia care – a cross-sectional study to identify factors associated with proxy-ratings
Source: Springer Nature journal article supplement (doi:10.1186/s12955-014-0177-1), 2014-12-01
Supplement: MOESM5 [file 9763894]

Tab 5: Factors Associated with QUALIDEM-ratings

| **Dependent variable** | **p-value** | **R2** | **Significant independent variable** |
| --- | --- | --- | --- |
| QUALIDEM**: Total score** | **p< 0.001** | 0.165 | Challenging behavior (CMAI) ★★★  Burnout (MBI – D) ★ Time being on the ward (nurse) ★  Satisfaction with life (SWLS) ★★ |
| non-significant independent variable: 2, 3, 4, 5, 6, 7, 8, 10, 12, 13, 15 (see underline) | | |
| QUALIDEM**: Care relationship** | **p< 0.001** | 0.227 | Challenging behavior (CMAI) ★★★  Severity of dementia (GDS) ★ Burnout (MBI – D) ★★  Satisfaction with life (SWLS) ★★ |
| non-significant independent variable: 3, 4, 5, 6, 7, 8, 10, 11, 12, 13, 15 (see underline) | | |
| QUALIDEM**: Positive affect** | **p< 0.001** | 0.182 | Challenging behavior (CMAI) ★★  Burnout (MBI-PA) ★★  Circumstances of ratings★★ |
| non-significant independent variable: 2, 3, 4, 5, 6, 7, 9, 11, 12, 13, 14, 15 (see underline) | | |
| QUALIDEM **Negative affect** | **p< 0.001** | 0.209 | Sex (residents) ★★★  Burnout (MBI – EE) ★★★  Burnout (MBI – D) ★  Circumstances of ratings★  Attitude (ADQ) ★★  Empathy (JSPE) ★  Satisfaction with life (SWLS) ★★ |
| non-significant independent variable: 1, 2, 4, 5, 6, 8, 11, 15 (see underline) | | |
| QUALIDEM **Restless tense behavior** | **p< 0.001** | 0.244 | Challenging behavior (CMAI) ★★★  Severity of dementia (GDS) ★★★  Responsible nurse (yes/no) ★  Burnout (MBI – EE) ★  Burnout (MBI – D) ★ Circumstances of ratings★★  Time being on the ward (nurse) ★  Satisfaction with life (SWLS) ★★ |
| non-significant independent variable: 3, 4, 6, 8, 12, 13, 15 (see underline) | | |
| QUALIDEM **Positive self image*** | p=0.033 | 0.486 | --- |
| non-significant independent variable: 1, 2, 3, 4, 5, 6, 7, 8, 9, 10, 11, 12, 13, 14, 15 (see underline) | | |
| QUALIDEM **Social relations** | p=0.088 | 0.099 | Satisfaction with life (SWLS) ★ |
| non-significant independent variable: 1, 2, 3, 4, 5, 6, 7, 8, 9, 10, 11, 12, 13, 15 (see underline) | | |
| QUALIDEM **Social isolation** | **p< 0.001** | 0.173 | Challenging behavior (CMAI) ★★★  Satisfaction with life (SWLS) ★★ |
| non-significant independent variable: 2, 3, 4, 5, 6, 7, 8, 9, 10, 11, 12, 13, 15 (see underline) | | |
| QUALIDEM **Feeling at home*** | p=0.010 | 0.532 | --- |
| non-significant independent variable: 1, 2, 3, 4, 5, 6, 7, 8, 9, 10, 11, 12, 13, 14, 15 (see underline) | | |
| QUALIDEM **Having something to do*** | p=0.759 | 0.268 | --- |
| non-significant independent variable: 1, 2, 3, 4, 5, 6, 7, 8, 9, 10, 11, 12, 13, 14, 15 (see underline) | | |  |

1: min. 1 challenging behavior (CMAI); 2: severity of dementia (GDS); 3: sex (residents); 4: sex (nurses); 5: responsible nurse (yes/no); 6: registered nurse (yes/no); 7: Burnout – emotional exhaustion (MBI-EE); 8: Burnout – personal accomplishment (MBI-PA); 9: Burnout – depersonalization (MBI-D); 10: Circumstances of ratings; 11: time being on the ward (nurse); 12: attitude – ADQ (total score); 13: empathy (JSPE); 14: satisfaction with life (SWLS); 15: days worked in advanced of the ratings; * not for GDS = 7

★p<0.05, ★★ p<0.10, ★★★ p<0.001
